# Supplementary material for: Role of Polyunsaturated Fatty Acids (PUFAs) and Eicosanoids on Dry Eye Symptoms and Signs
Source: MDPI journal article supplement (doi:10.3390/biom14030376), 2024-03-20
Supplement: s1 [file s1]

**Supplemental Table S1.** Median and ranges for tear lipids collected.

| Pro-Inflammatory         |                     |                  |                   |                   | Anti-Inflammatory    |              |                  |                  | Pro:anti-Inflammatory Ratios |                    |                   |
|--------------------------|---------------------|------------------|-------------------|-------------------|----------------------|--------------|------------------|------------------|------------------------------|--------------------|-------------------|
| Median (min-max)         |                     |                  |                   |                   |                      |              |                  |                  |                              |                    |                   |
| AA*                      | TXB <sub>2</sub>    | 5-HETE           | 12-HETE           | 15-HETE           | DHA                  | EPA          | 11,12 DHET       | 14,15 DHET       | AA: DHA                      | AA: EPA            | ω6:ω3             |
| 629.6<br>(65.0–4921.7)   | 12.1<br>(0.0–149.8) | 0.8<br>(0.1-4.3) | 2.9<br>(0.2–13.7) | 1.3<br>(0.1-12.5) | 82.4<br>(11.9–480.2) | 9.1 (0–95.7) | 0.0<br>(0.0–0.2) | 0.1<br>(0.0–0.4) | 7.0<br>(4.1–15.2)            | 64.1<br>(0–1365.1) | 6.5<br>(3.0–12.7) |
| Percentage (%) recovered |                     |                  |                   |                   |                      |              |                  |                  |                              |                    |                   |
| 100%                     | 58%                 | 100%             | 100%              | 100%              | 100%                 | 95%          | 68%              | 85%              | 100%                         | 95%                | 100%              |

**AA:** Arachidonic acid; **TXB<sub>2</sub>:** Thromboxane B<sub>2</sub>; **5-HETE:** 5-hydroxyeicosatetraenoic acid; **12-HETE:** 12-hydroxyeicosatetraenoic acid; **15-HETE:** 15-Hydroxyeicosatetraenoic acid; **DHA:** Docosahexaenoic acid; **EPA:** Eicosapentaenoic acid; **11,12 DHET:** 11,12-dihydroxyeicosatrienoic acid; **14,15 DHET:** 14,15-dihydroxyeicosatrienoic acid; **ω6:** Omega 6; **ω3:** Omega 3. \* Unit of each lipid is normalized with the amount of protein in the sample as a pico mole of lipid per milligram of protein [pmol/mg protein].
